# Supplementary material for: The effect of magnesium on mitotic spindle formation in Schizosaccharomyces pombe
Source: PubMed Central journal article supplement (PMC5004833; doi:10.1590/1678-4685-gmb-2015-0239), 2016-07-07
Supplement: 1415-4757-gmb-1678-4685-GMB-2015-0239-Suppl01.pdf [file 1415-4757-gmb-1678-4685-GMB-2015-0239-Suppl01.pdf]

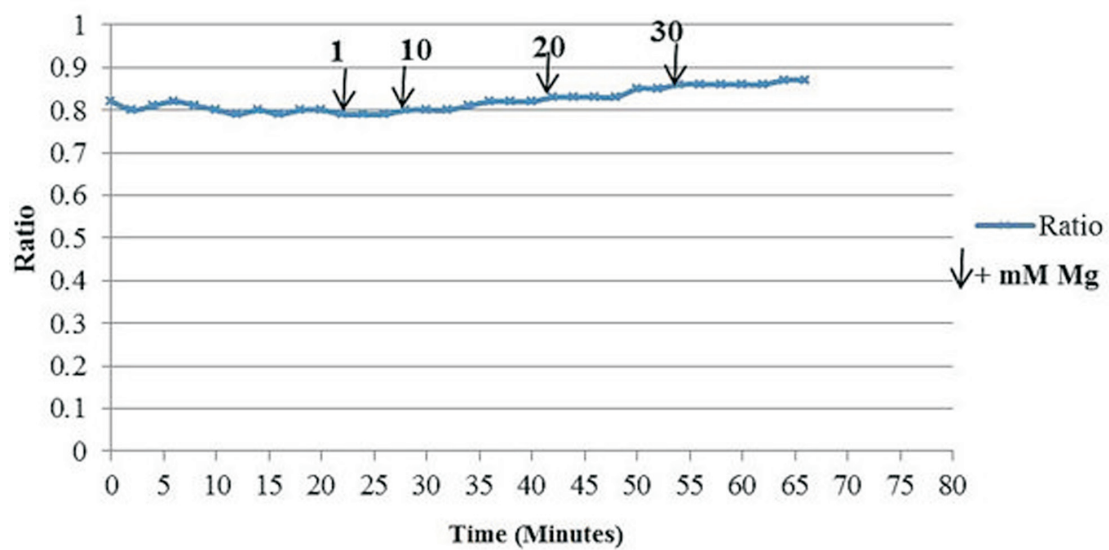

**Figure S1** - Ratio values showing the intracellular Mg<sup>2+</sup> concentration when the extracellular Mg<sup>2+</sup> concentration was increased to 1, 10, 20 and 30 mM (at arrows).
