# Supplementary material for: The effect of magnesium on mitotic spindle formation in Schizosaccharomyces pombe
Source: PubMed Central journal article supplement (PMC5004833; doi:10.1590/1678-4685-gmb-2015-0239), 2016-07-07
Supplement: 1415-4757-gmb-1678-4685-GMB-2015-0239-Suppl02.pdf [file 1415-4757-gmb-1678-4685-GMB-2015-0239-Suppl02.pdf]

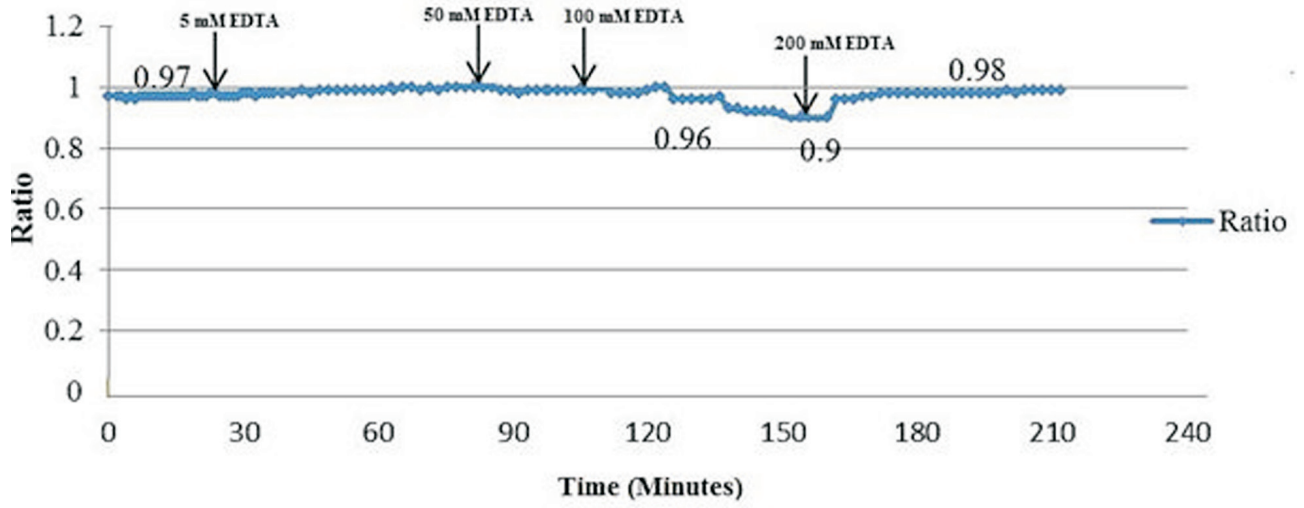

Figure S2 - Ratio values showing the intracellular  $Mg^{2+}$  concentration when EDTA was added extracellularly to concentrations of 5, 50, 100 and 200 mM.
