# Supplementary material for: The effect of magnesium on mitotic spindle formation in Schizosaccharomyces pombe
Source: PubMed Central journal article supplement (PMC5004833; doi:10.1590/1678-4685-gmb-2015-0239), 2016-07-07
Supplement: 1415-4757-gmb-1678-4685-GMB-2015-0239-Suppl03.pdf [file 1415-4757-gmb-1678-4685-GMB-2015-0239-Suppl03.pdf]

**A**

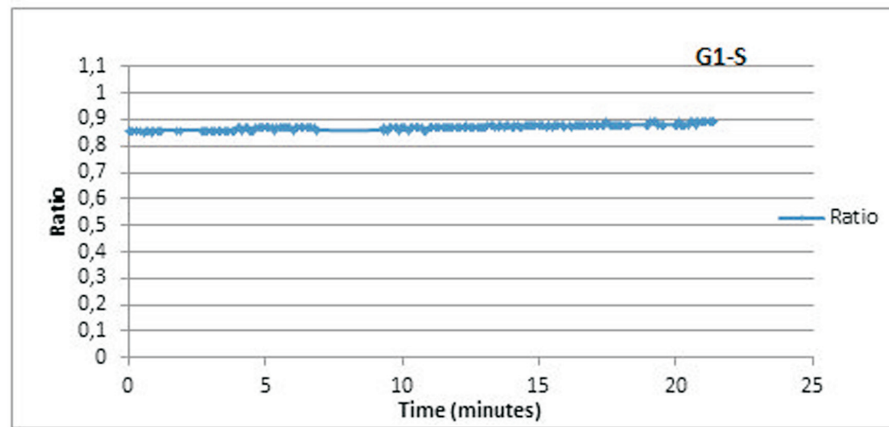

**B**

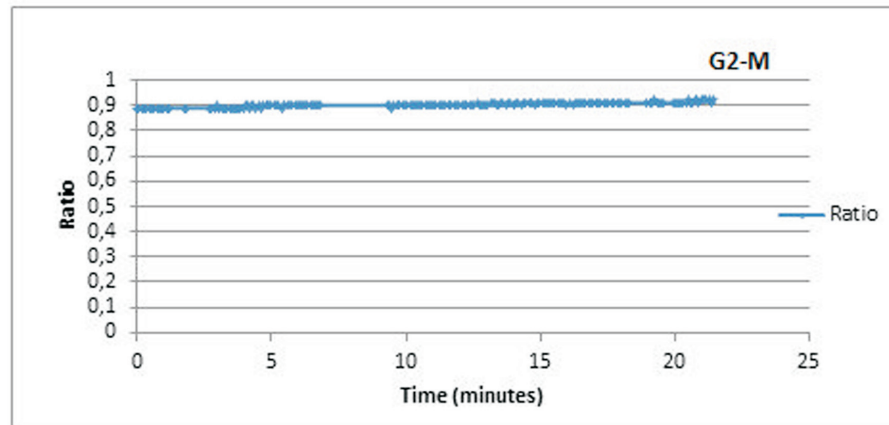

**Figure S3** - Ratio values for the G1-S phase (A) and G2-M phase (B) in Sp292 cells.
