# Supplementary material for: The effect of magnesium on mitotic spindle formation in Schizosaccharomyces pombe
Source: PubMed Central journal article supplement (PMC5004833; doi:10.1590/1678-4685-gmb-2015-0239), 2016-07-07
Supplement: 1415-4757-gmb-1678-4685-GMB-2015-0239-Suppl04.pdf [file 1415-4757-gmb-1678-4685-GMB-2015-0239-Suppl04.pdf]

### Supplemental Data

**Table S1:** Comparison of cell length ( $\mu\text{m}$ ) between Sp292 and GA2 cells

| <b>GA2 (cell number)</b>  | <b>Cell Length (<math>\mu\text{m}</math>)</b> |
|---------------------------|-----------------------------------------------|
| 1                         | 5.976                                         |
| 2                         | 7.450                                         |
| 3                         | 11.564                                        |
| 4                         | 16.721                                        |
| 5                         | 11.914                                        |
| 6                         | 7.204                                         |
| <b>Average</b>            | <b>10.138</b>                                 |
| <b>SD</b>                 | <b>3.690</b>                                  |
|                           |                                               |
| <b>Sp292(cell number)</b> | <b>Cell Length (<math>\mu\text{m}</math>)</b> |
| 1                         | 4.379                                         |
| 2                         | 5.715                                         |
| 3                         | 6.552                                         |
| 4                         | 3.534                                         |
| 5                         | 4.413                                         |
| 6                         | 5.321                                         |
| 7                         | 5.820                                         |
| 8                         | 5.746                                         |
| <b>Average</b>            | <b>5.185</b>                                  |
| <b>SD</b>                 | <b>0.925</b>                                  |

Cell length for **GA2** strain:  $10.138 \pm 3.69 \mu\text{m}$  and for **SP292** strain:  $5.185 \pm 0.925 \mu\text{m}$ . ImageJ program was used for cell length measurements.
